# Supplementary material for: Salvia Miltiorrhiza Root Water-Extract (Danshen) Has No Beneficial Effect on Cardiovascular Risk Factors. A Randomized Double-Blind Cross-Over Trial
Source: PLoS One. 2015 Jul 20;10(7):e0128695. doi: 10.1371/journal.pone.0128695 (PMC4508048; doi:10.1371/journal.pone.0128695)
Supplement: S1 Table — (XLSX) [file pone.0128695.s005.xlsx]

## Sheet: Lipids
Subject number	Randomisation (A: Danshen first; B: placebo first)	Placebo Baseline TC	Placebo Baseline Triglycerides	Placebo Baseline HDL	Placebo Baseline LDL	Placebo Baseline ApoB	Placebo Treatment TC	Placebo Treatment Triglycerides	Placebo Treatment HDL	Placebo Treatment LDL	Placebo Treatment ApoB	Danshen Baseline TC	Danshen Baseline Triglycerides	Danshen Baseline HDL	Danshen Baseline LDL	Danshen Baseline ApoB	Danshen Treatment TC	Danshen Treatment TG	Danshen Treatment HDL	Danshen Treatment LDL	Danshen Treatment ApoB
1	B	5.8	2.04	0.94	3.94	1.17	6	1.59	0.9	4.38	1.22	5.3	1.32	0.85	3.86	1.03	6.1	1.8	0.88	4.41	1.18
2	B	5.9	1.59	1.17	4.01	1.09	5.8	2.12	1.24	3.61	0.95	6.2	1.73	1.24	4.18	1.08	6.1	1.76	1.21	4.1	1.08
8	B	6	0.88	1.34	4.26	0.91	4.7	0.77	1.36	2.99	0.73	5	0.81	1.39	3.25	0.75	5	0.64	1.25	3.46	0.76
9	B	6.2	2.68	0.97	4.02	1.35	5.6	2.63	0.9	3.52	1.19	5.5	2.84	0.86	3.36	1.17	6	2.51	0.93	3.94	1.25
11	B	6.8	4.04	1.3	3.68	1.23	7	3.89	1.43	3.82	1.26	6.3	3.25	1.4	3.44	1.15	6.6	3.85	1.35	3.52	1.09
12	B	6.6	2.35	0.95	4.59	1.37	6	2.42	0.85	4.06	1.26	6.7	2.17	0.96	4.76	1.36	6.4	1.93	0.99	4.54	1.32
13	B	5.4	0.81	1.57	3.47	0.85	6.7	1.58	1.53	4.46	1.12	6.3	1.05	1.6	4.23	1.01	7	1.69	1.58	4.66	1.18
15	B	6.4	1.45	1.33	4.42	1.07	6.1	1.01	1.51	4.14	1.02	6.2	1.38	1.37	4.21	0.94	6.4	1.33	1.48	4.32	0.98
19	B	6.2	3.92	0.89	3.55	1.15	4.9	3.5	0.74	2.59	0.94	5.7	3.79	0.81	3.18	1.11	5.8	4.2	0.8	3.11	1.09
21	B	4.7	1.44	0.97	3.08	0.91	5	1.73	0.87	3.35	0.89	5.3	1.69	0.89	3.65	0.98	5.3	2	0.89	3.51	0.98
23	B	4.9	1.61	0.97	3.21	0.93	5.1	2.2	1.08	3.03	0.92	5.2	1.81	0.98	3.41	1.05	5.4	1.4	1.18	3.59	1.18
3	A	5.4	0.52	1.46	3.71	0.88	5.2	0.65	1.5	3.41	0.76	5.4	0.64	1.49	3.62	0.89	5.4	0.56	1.57	3.58	0.81
4	A	5.2	0.67	1.17	3.73	0.93	5.6	0.99	1.16	3.99	0.99	4.8	0.65	1.22	3.29	0.84	5.4	0.77	1.19	3.86	0.92
6	A	4.6	0.87	1.37	2.84	0.73	4.7	0.83	1.44	2.89	0.71	4.8	0.69	1.43	3.06	0.77	4.8	0.84	1.39	3.03	0.71
7	A	5	1.09	1.62	2.89	0.68	5.2	1.1	1.64	3.07	0.72	4.9	1.09	1.67	2.74	0.71	5.2	1.19	1.66	3	0.71
16	A	6.9	1.25	1.74	4.6	1.06	7.4	1.53	1.78	4.93	1.14	6.9	1.88	1.83	4.22	1.13	7.9	1.93	1.87	5.16	1.3
17	A	3.6	0.59	1.19	2.14	0.49	5	1.22	1.54	2.91	0.7	5	0.76	1.6	3.06	0.76	5	0.75	1.43	3.23	0.73
18	A	5.2	0.81	1.23	3.61	0.91	4.6	1	1.02	3.13	0.85	5.5	1.02	1.16	3.88	1.08	6.1	1.31	1.24	4.27	1.05
20	A	6.4	1.66	1.21	4.44	1.13	5.8	1.24	1.08	4.16	1.01	6.1	1.39	1.21	4.26	1.15	6.1	1.77	1.01	4.29	1.06
22	A	4.8	3.88	0.71	2.34	0.97	4.6	4.26	0.72	1.96	1.01	5	5.2	0.69		1.03	4.8	2.78	0.7	2.85	0.98

## Sheet: 24h ABPM
Subject number	Randomisation (A: Danshen first; B: placebo first)	Danshen SBP 24 hours	Danshen SBP Day	Danshen SBP Night	Danshen DBP 24 hours	Danshen DBP Day	Danshen DBP Night	Danshen MAP 24 hours	Danshen MAP day	Danshen MAP night	Danshen Heart Rate 24 hours	Danshen Heart Rate Day	Danshen Heart Rate Night	Placebo SBP 24 hours	Placebo SBP Day	Placebo SBP Night	Placebo DBP 24 hours	Placebo DBP Day	Placebo DBP Night	Placebo MAP 24 hours	Placebo MAP day	Placebo MAP night	Placebo Heart Rate 24 hours	Placebo Heart Rate Day	Placebo Heart Rate Night
1	B	145	149	133	93	95	88	117	120	109	76	78	71	141	143	134	89	91	84	113	115	107	80	82	74
2	B	129	133	117	80	84	70	103	107	91	72	71	75	135	140	121	81	84	71	106	110	94	77	78	72
3	A	122	125	114	82	83	77	100	102	94	70	75	54	117	120	105	76	78	70	94	97	86	62	67	49
4	A	154	156	150	104	106	98	127	129	121	79	80	76	131	136	119	86	91	72	107	111	94	78	80	74
6	A	122	123	118	72	73	67	95	96	91	54	56	49	121	125	112	69	73	61	93	97	84	54	55	50
7	A	109	110	109	66	67	65	89	87	85	61	62	58	113	114	111	72	74	69	91	92	88	58	60
8	B	132	136	118	85	88	75	107	110	95	66	69	54	124	128	114	79	83	68	100	104	89	63	65	58
9	B	144	147	132	100	102	92	120	123	111	95	99	83	143	147	130	105	110	89	122	127	108	97	102	82
11	B	134	136	128	75	76	75	102	104	97	65	68	54	143	146	133	83	84	76	110	113	102	66	68	60
12	B	162	167	145	104	108	95	131	135	117	81	85	69	157	162	145	99	102	92	126	130	116	80	82	76
13	B	136	139	129	81	83	74	106	109	99	81	84	74	122	124	116	75	77	71	97	99	92	85	90	74
15	B	137	139	131	94	95	89	113	115	108	83	87	69	142	144	134	94	96	89	116	18	109	72	74	66
16	A	136	141	122	84	87	76	108	112	97	71	74	61	157	159	154	95	97	88	124	125	118	70	72	63
17	A	129	132	123	85	87	79	105	108	99	65	69	56	131	133	121	87	89	80	107	109	99	73	76	60
18	A	146	150	135	92	94	85	117	120	108	66	67	65	146	151	132	91	94	84	116	120	106	73	73	72
19	B	160	161	158	106	107	105	131	132	129	84	89	71	146	149	139	93	93	91	117	119	113	85	88	78
20	A	117	122	103	86	90	72	100	105	86	70	74	58	111	116	98	80	83	69	94	98	82	65	67	59
21	B	137	141	124	96	100	79	115	119	100	68	68	68	130	135	117	93	101	77	110	117	95	68	68	68
22	A	142	144	136	93	94	88	115	117	110	73	72	76	130	133	122	85	89	76	106	109	98	72	74	65
23	B	190	195	165	101	104	83	142	146	120	70	72	63	181	183	174	103	106	95	139	141	132	66	67	60

## Sheet: 20 min automat supine recording
Subject number	Randomisation (A: Danshen first; B: placebo first)	Screening SBP	Screening DBP	Danshen Baseline SBP	Danshen Baseline DBP	Danshen Treatment SBP	Danshen Treatment DBP	Placebo Baseline SBP	Placebo Baseline DBP	Placebo Treatment SBP	Placebo Treatment DBP
1	B	160	90	141	80	151	86	149	88	153	90
2	B	140	86	141	87	142	86	142	87	147	89
3	A	146	81	129	79	145	87	127	79	127	80
4	A	155	89	151	96	165	101	152	93	148	93
6	A	125	67	123	60	124	66	119	68	135	71
7	A	125	69	122	67	124	71	123	68	126	70
8	B	121	75	133	84	138	80	146	88	120	76
9	B	139	98	129	86	139	100	127	89	148	107
11	B	162	84	158	84	151	80	151	82	160	87
12	B	166	97	161	96	169	100	155	94	157	96
13	B	149	90	151	86	158	95	158	95	156	93
15	B	136	95	127	79	132	87	126	84	128	84
16	A	158	90	138	84	144	83	140	82	151	86
17	A	147	92	143	89	149	86	139	79	149	85
18	A	146	85	152	86	139	79	140	77	160	92
19	B	147	98	146	98	160	103	147	98	138	94
20	A	141	90	133	85	127	81	130	81	145	87
21	B	136	91	129	91	137	92	127	86	134	89
22	A	137	87	131	89	151	102	136	95	144	93
23	B	147	89	169	87	171	77	157	83	165	80
